# Supplementary material for: Identification of novel aptamers targeting cathepsin B-overexpressing prostate cancer cells
Source: Royal Society of Chemistry journal article supplement (doi:10.1039/d2me00022a), 2022-01-01
Supplement: d2me00022a1.pdf [file d2me00022a1.pdf]

## Supplementary Information

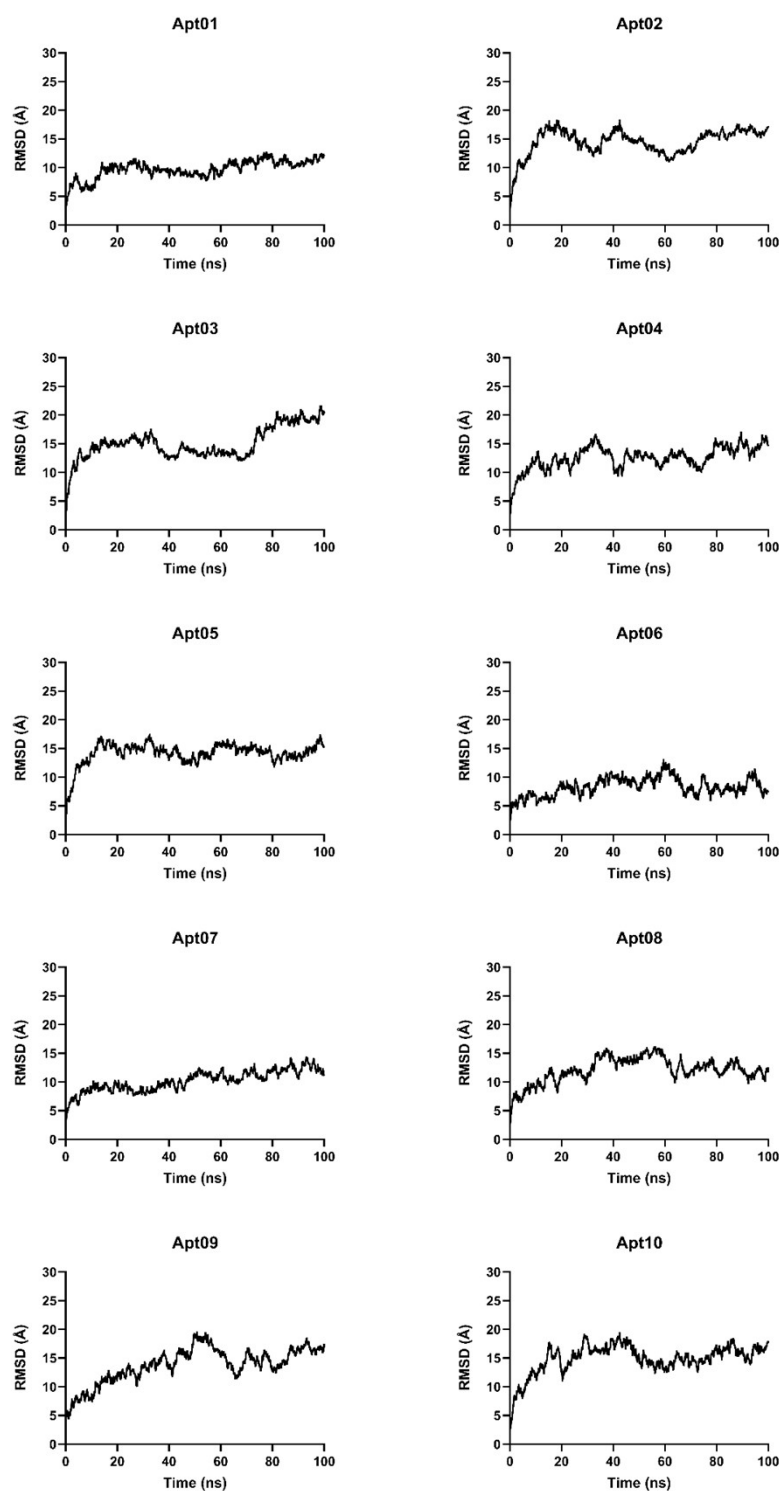

**Figure S1.** Root Mean Square Deviation (RMSD) values of all non-hydrogen atoms as a function of time for the 100 ns of the Molecular Dynamic (MD) simulation of aptamers Apt01 to Apt10. The equilibrated structure was used as the reference point for the RMSD calculation.

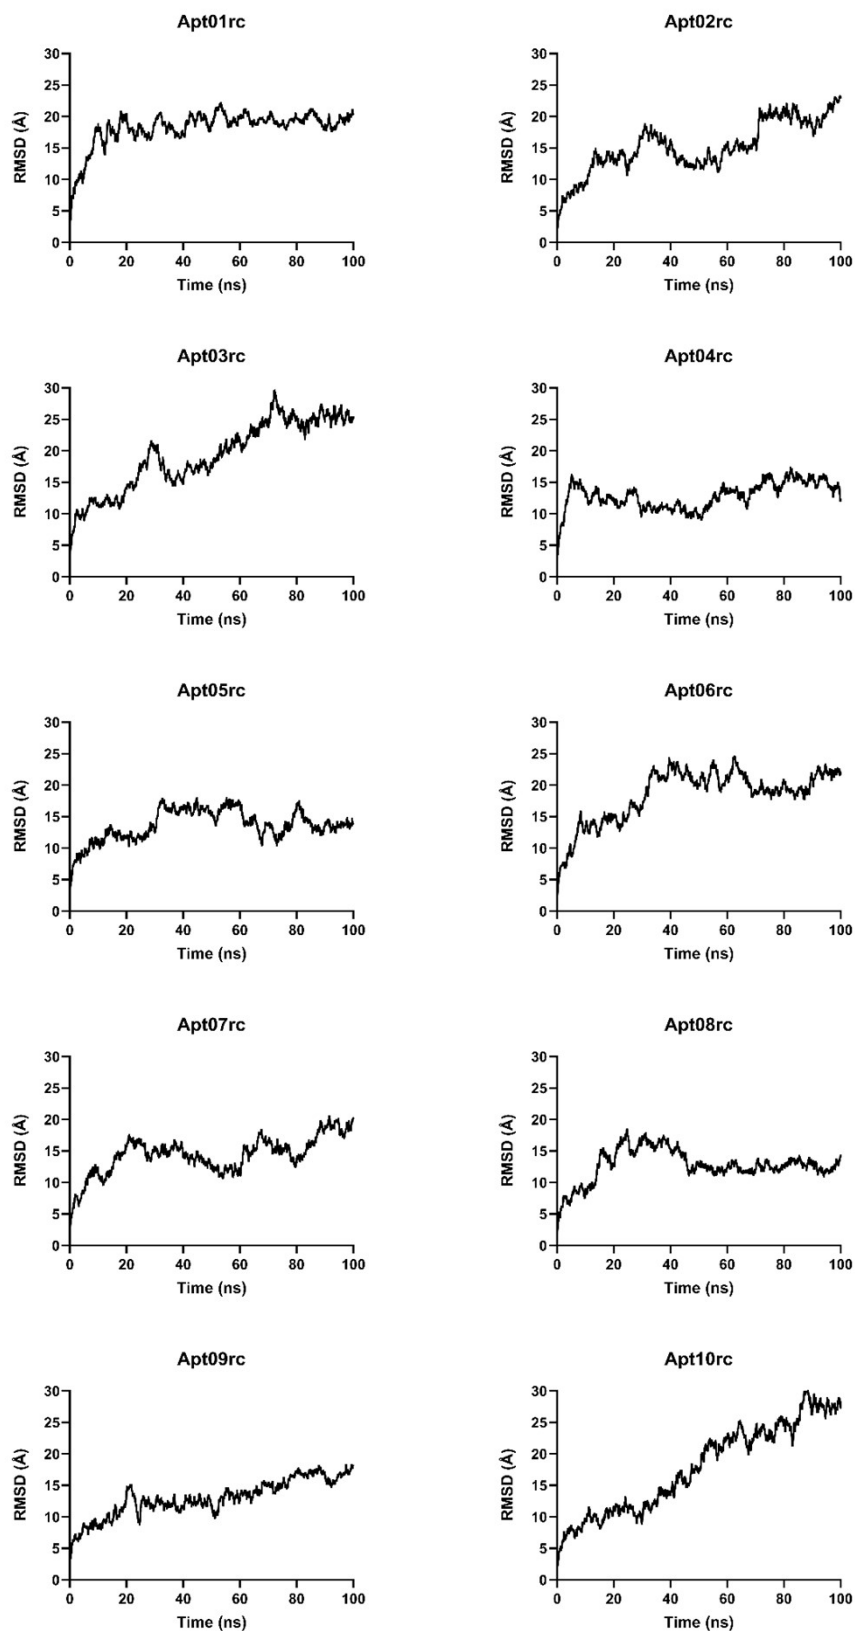

**Figure S2.** Root Mean Square Deviation (RMSD) values of all non-hydrogen atoms as a function of time for the 100 ns of the Molecular Dynamic (MD) simulation of aptamers Apt01rc to Apt10rc. The equilibrated structure was used as the reference point for the RMSD calculation.

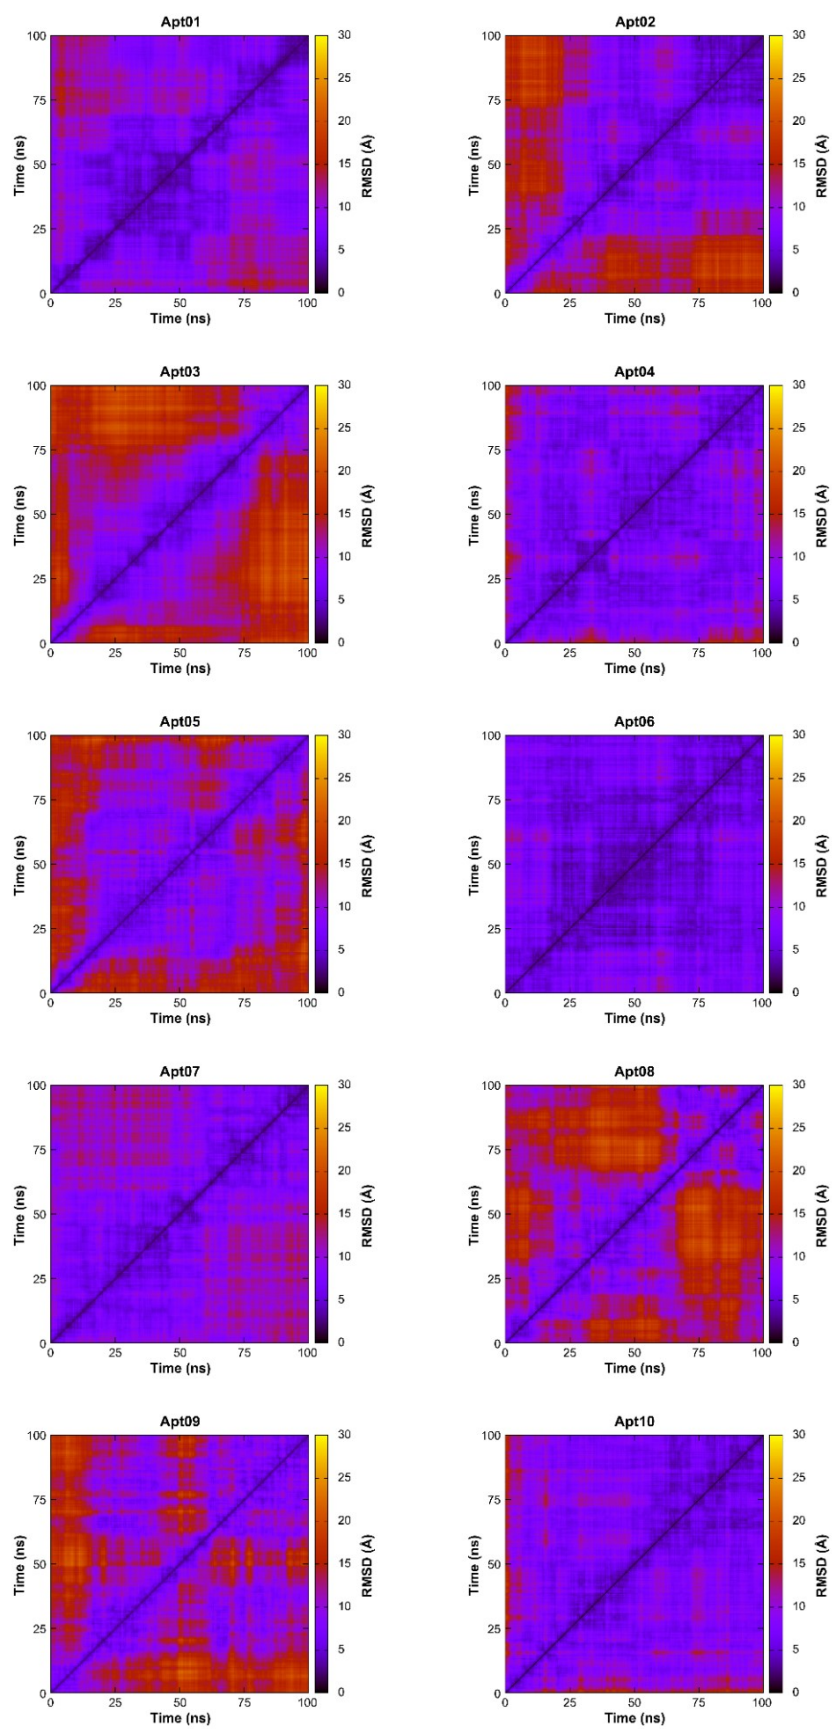

**Figure S3.** Pairwise Root Mean Square Deviation (RMSD) of all non-hydrogen atoms of aptamers Apt01 to Apt10.

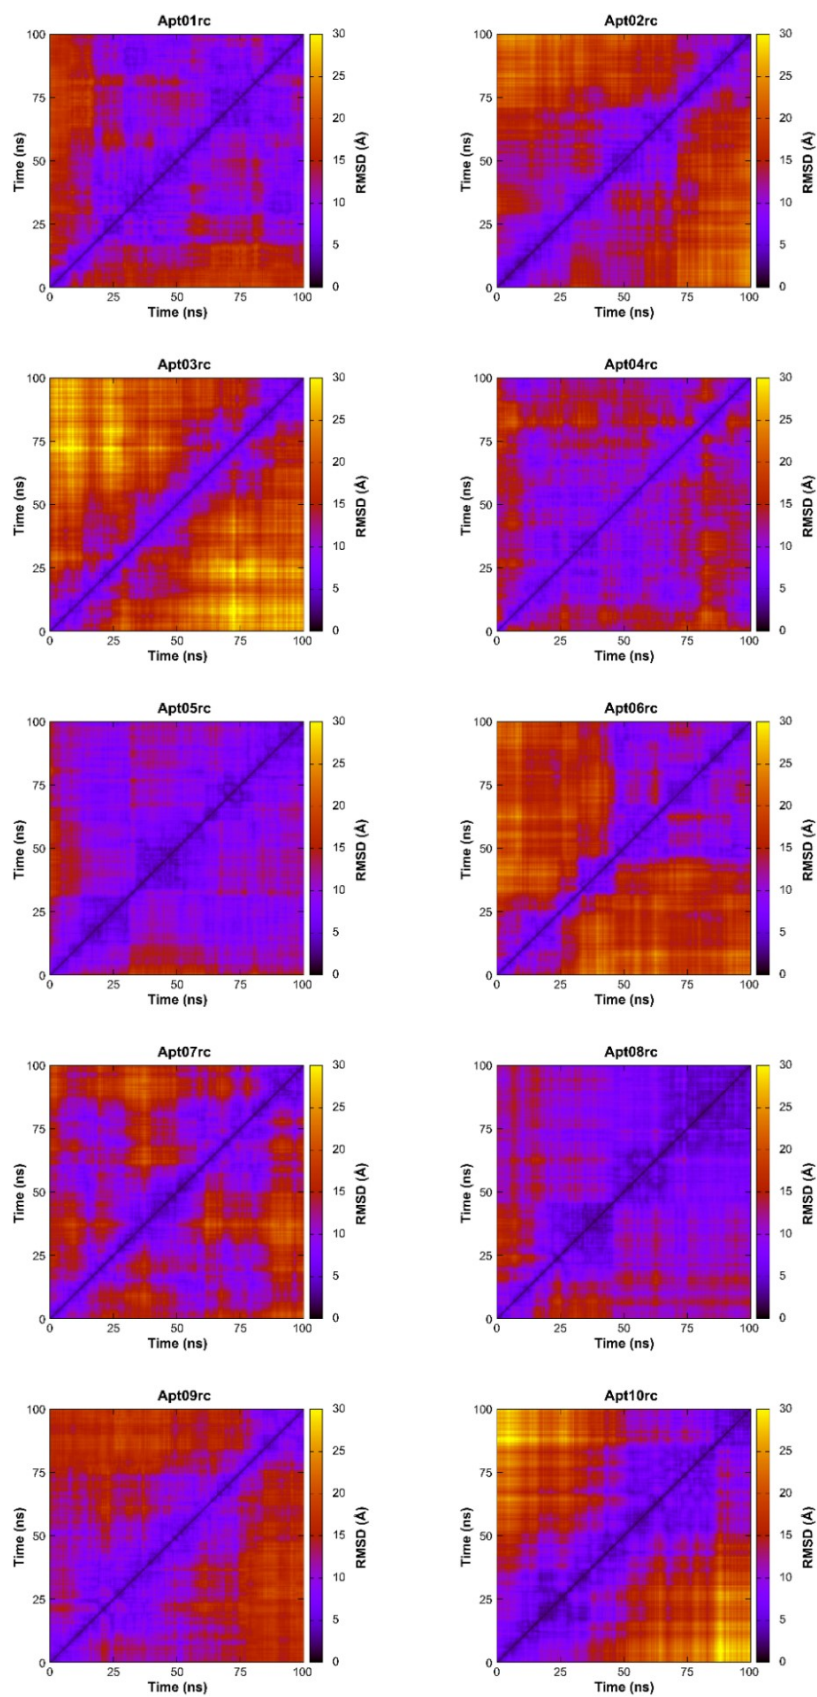

**Figure S4.** Pairwise Root Mean Square Deviation (RMSD) of all non-hydrogen atoms of aptamers Apt01rc to Apt10rc.

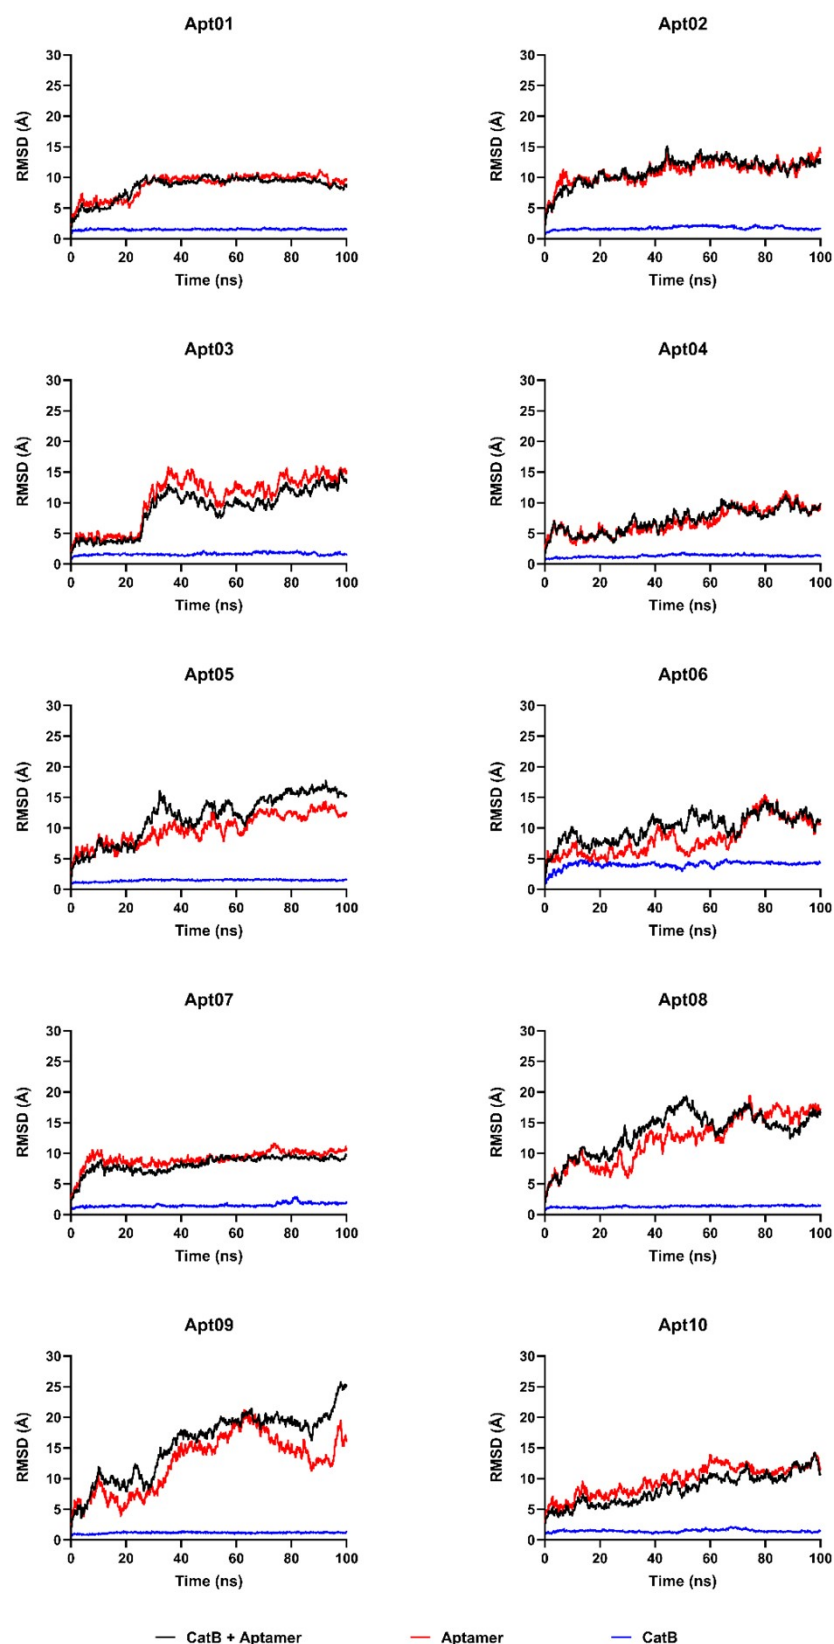

**Figure S5.** Root Mean Square Deviation (RMSD) values as a function of time for the 100 ns of the Molecular Dynamic (MD) simulation of the complexes between aptamers Apt01 to Apt10 and Cathepsin B (Cat B). The equilibrated structure was used as the reference point for the RMSD calculation. In black is represented the RMSD of all non-hydrogen atoms of the complex CatB–Apt; red represents the RMSD of all non-hydrogen atoms of the aptamer; and in blue is represented the RMSD of  $\alpha$  atoms of Cat B backbone.

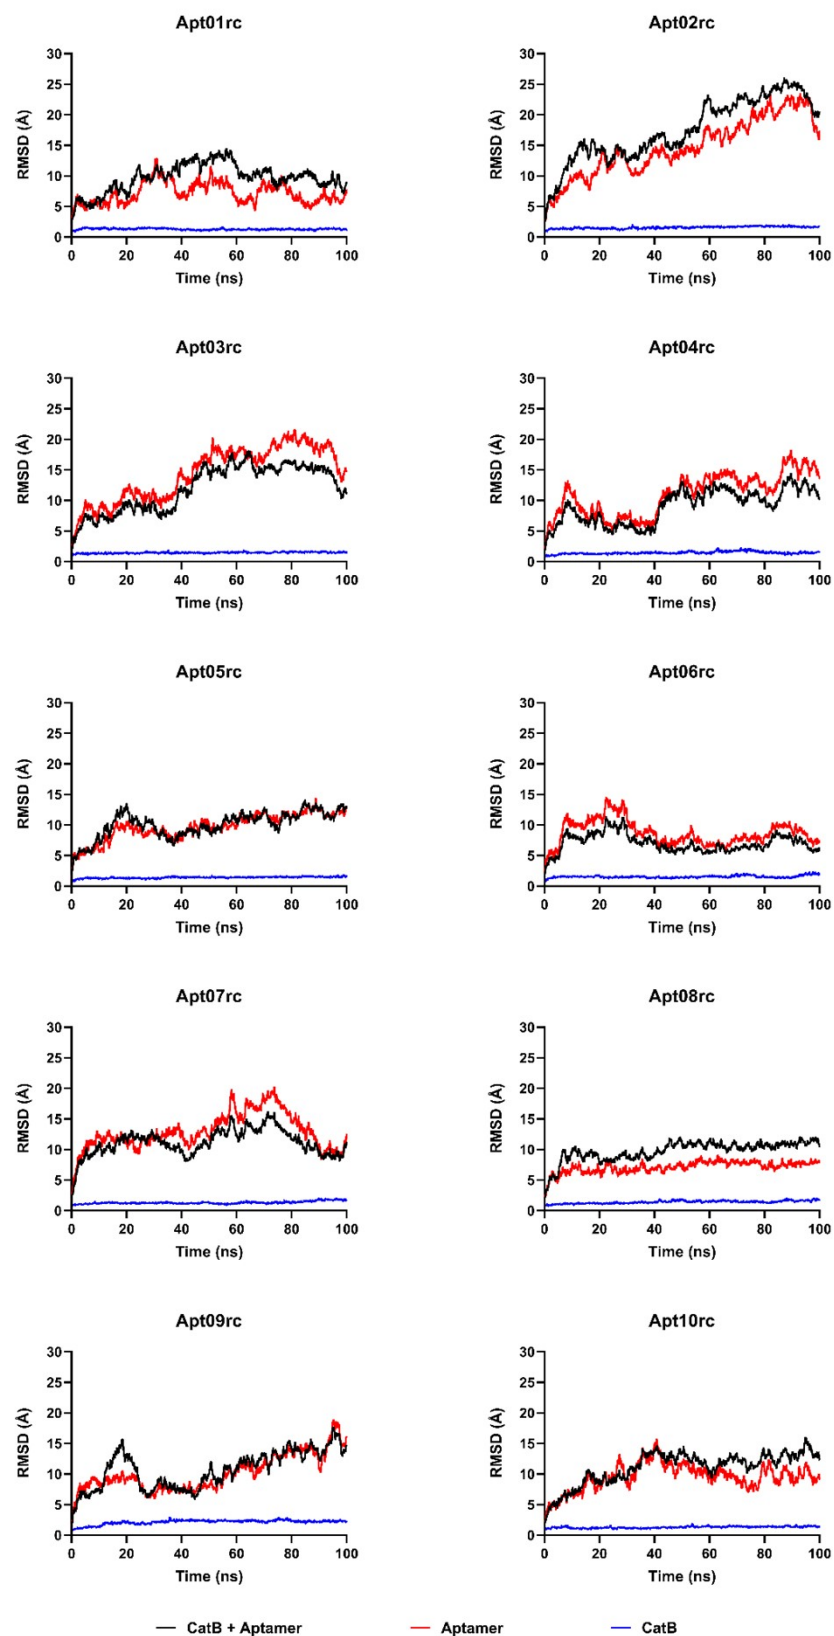

**Figure S6.** Root Mean Square Deviation (RMSD) values as a function of time for the 100 ns of the Molecular Dynamic (MD) simulation of the complexes between aptamers Apt01rc to Apt10rc and Cathepsin B (Cat B). The equilibrated structure was used as the reference point for the RMSD calculation. The RMSD of all non-hydrogen atoms of the complex CatB–Apt is represented in black; the RMSD of all non-hydrogen atoms of the aptamer is shown in red; and the RMSD of C $\alpha$  atoms of Cat B backbone is shown in blue.

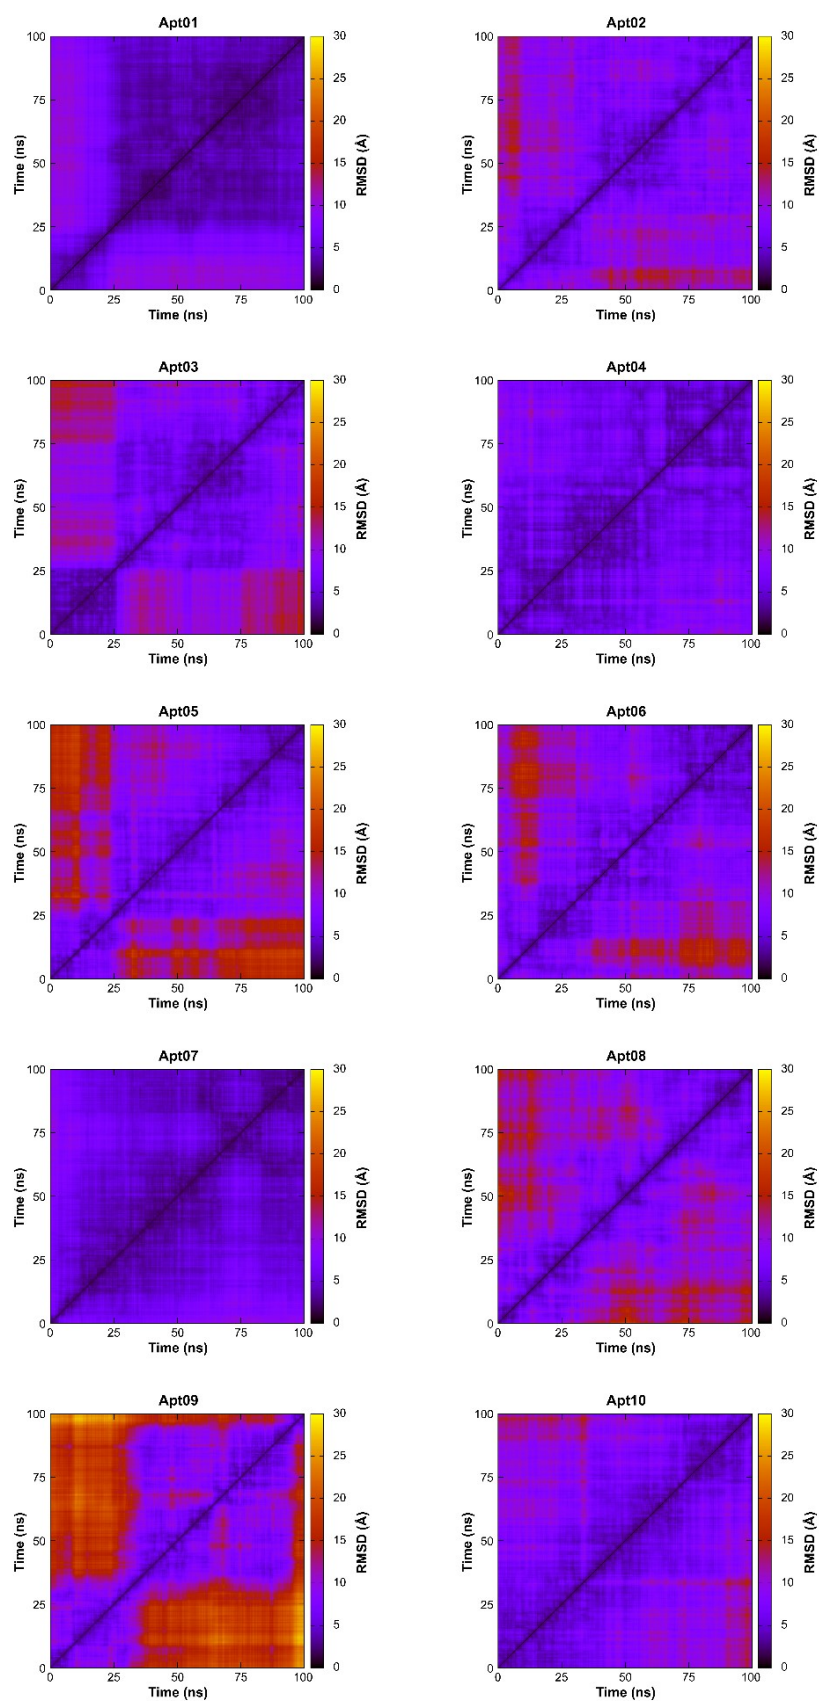

**Figure S7.** Pairwise Root Mean Square Deviation (RMSD) of all non-hydrogen atoms of the complex between the protein Cathepsin B and aptamers Apt01 to Apt10.

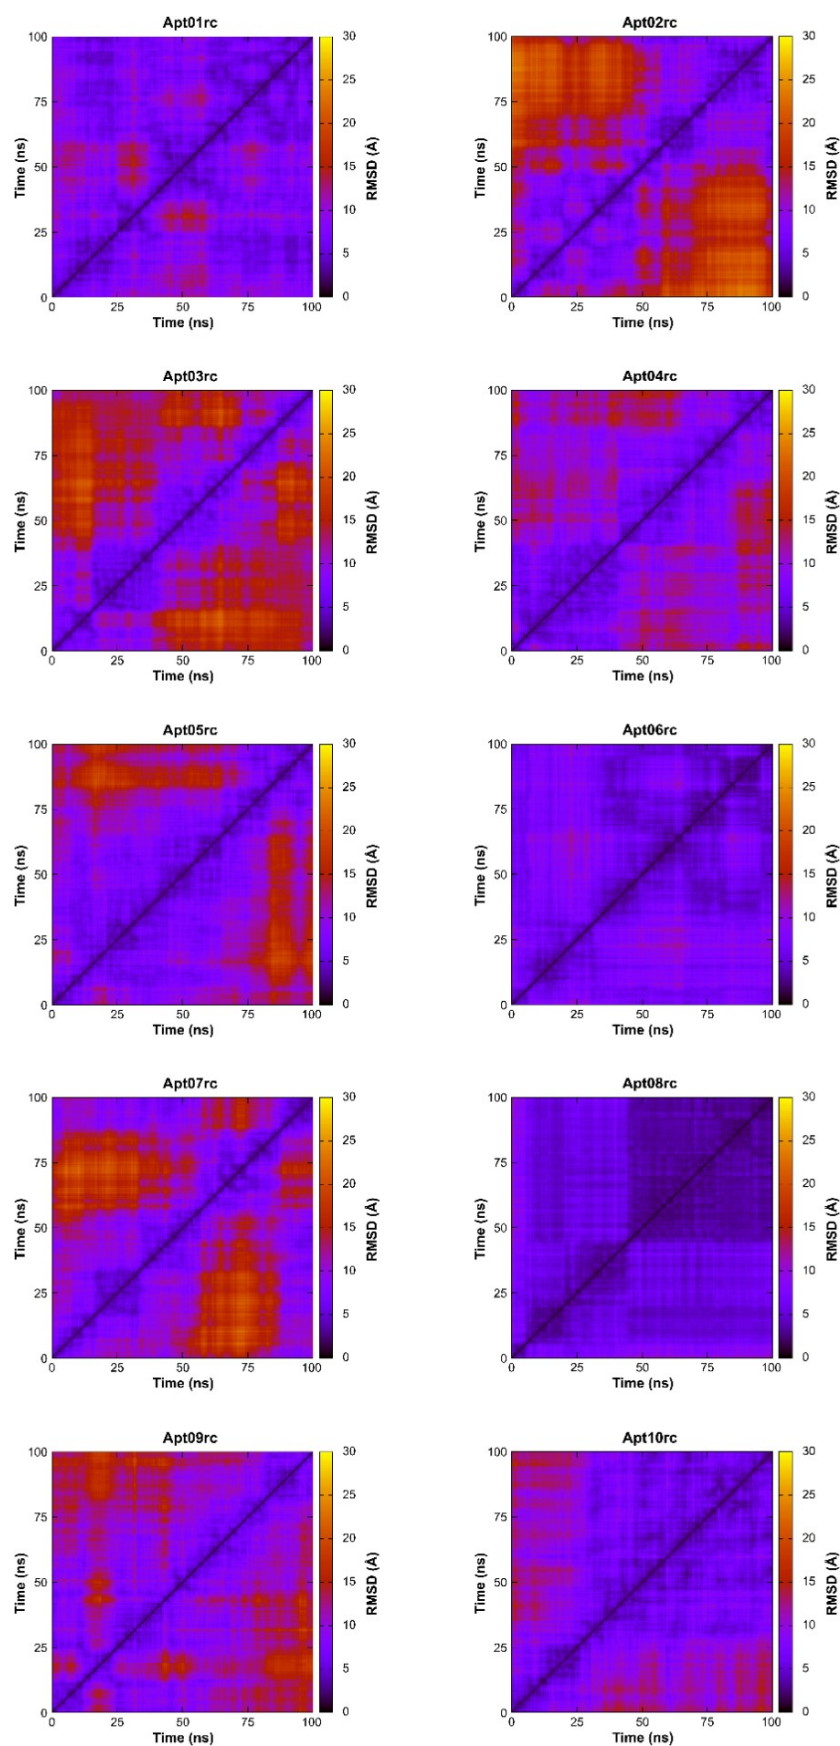

**Figure S8.** Pairwise Root Mean Square Deviation (RMSD) of all non-hydrogen atoms of the complex between the protein Cathepsin B and aptamers Apt01rc to Apt10rc.

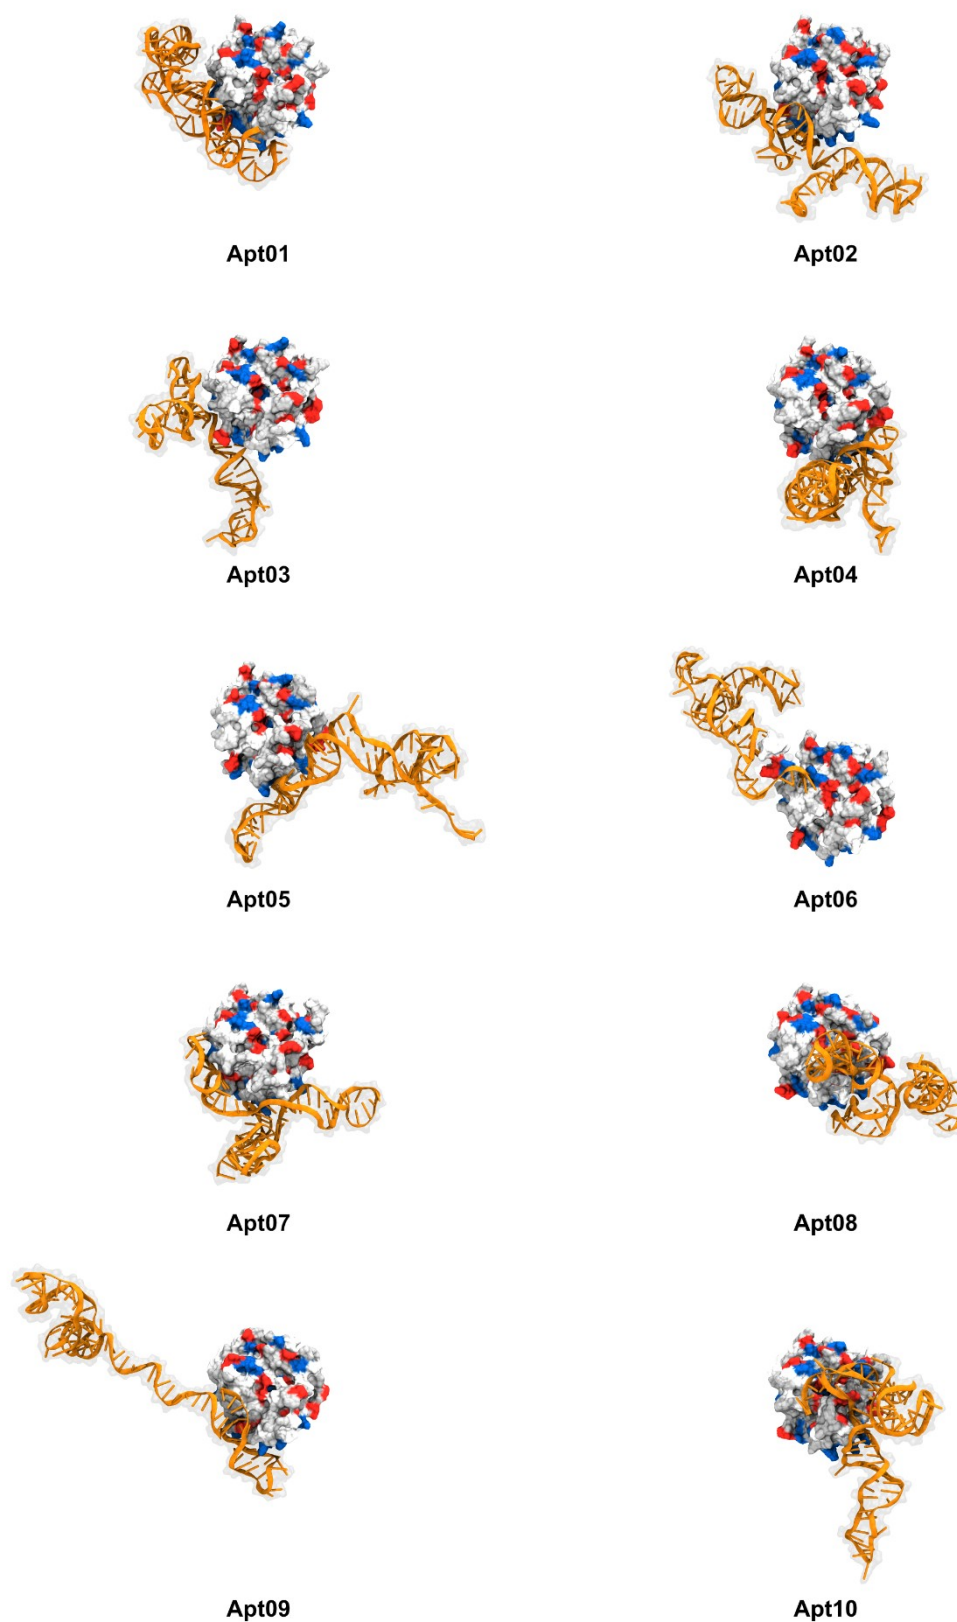

**Figure S9.** Representative structures of the complexes between the protein Cathepsin B (CatB) and aptamers Apt01 to Apt10 obtained by K-means clustering of the molecular dynamics simulation. CatB is represented in Surface and colored according to its residue type: Blue, positively charged side groups; Red, negatively charged side groups; White, non-polar with aliphatic or aromatic side groups; Grey, polar with uncharged side groups. The aptamers are represented in NewCartoon and are colored in Orange. All complexes are aligned by CatB.

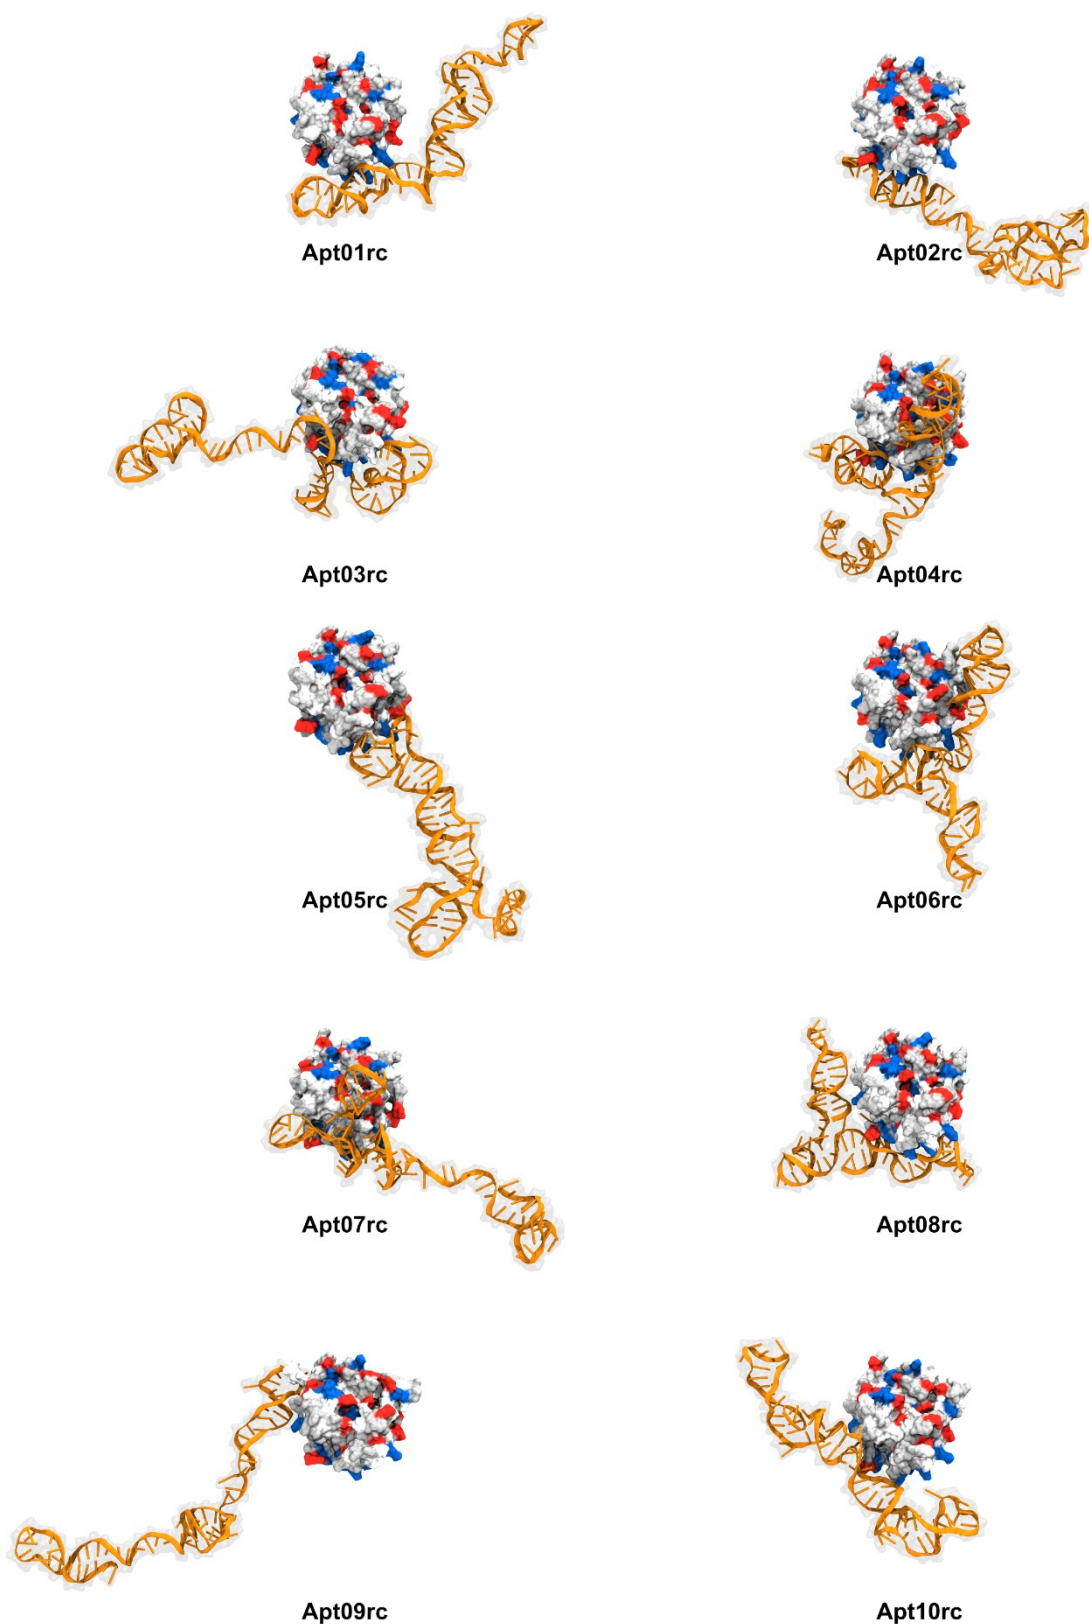

**Figure S10.** Representative structures of the complexes between the protein Cathepsin B (CatB) and aptamers Apt01rc to Apt10rc obtained by K-means clustering of the molecular dynamics simulation. CatB is represented in Surface and colored according to its residue type: Blue, positively charged side groups; Red, negatively charged side groups; White, non-polar with aliphatic or aromatic side groups; Grey, polar with uncharged side groups. The aptamers are represented in NewCartoon and are colored in Orange. All complexes are aligned by CatB.

**Table S1. Amino acid residues involved in the top five longest hydrogen bonds established between CatB and each aptamer.** The amino acid of CatB involved in the hydrogen bond, the percentage of simulation time where the hydrogen bond is formed, and the maximum lifetime of such hydrogen bond were determined for the 100 ns of the MD simulations of the CatB-Apt docked complexes. The aptamer chosen for experimental validation is highlighted in bold and grey.

| Aptamer        | Top 1        |            |                  | Top 2        |            |                  | Top 3         |            |                  | Top 4         |            |                  | Top 5        |            |                  |
|----------------|--------------|------------|------------------|--------------|------------|------------------|---------------|------------|------------------|---------------|------------|------------------|--------------|------------|------------------|
|                | Amino acid   | %Time      | Maximum Lifetime | Amino acid   | %Time      | Maximum Lifetime | Amino acid    | %Time      | Maximum Lifetime | Amino acid    | %Time      | Maximum Lifetime | Amino acid   | %Time      | Maximum Lifetime |
| Apt01          | Asp254       | 28%        | 0.9 ns           | Asn149       | 24%        | 1.7 ns           | Asn47         | 23%        | 0.8 ns           | Tyr148        | 21%        | 1.4 ns           | Arg252       | 20%        | 1.5 ns           |
| Apt02          | Asp252       | 43%        | 2.2 ns           | Tyr148       | 37%        | 1.1 ns           | Ser137        | 27%        | 1.9 ns           | Tyr148        | 25%        | 0.6 ns           | Asp254       | 23%        | 0.8 ns           |
| Apt03          | Arg85        | 66%        | 1.3 ns           | Asn167       | 65%        | 2.0 ns           | Ser150        | 60%        | 1.1 ns           | Tyr148        | 50%        | 1.4 ns           | Ser150       | 41%        | 0.8 ns           |
| Apt04          | Gly135       | 69%        | 0.9 ns           | Thr139       | 55%        | 2.2 ns           | Tyr140        | 49%        | 0.6 ns           | Cys128        | 31%        | 1.8 ns           | Lys141       | 29%        | 0.4 ns           |
| Apt05          | Thr139       | 92%        | 9.2 ns           | Lys141       | 81%        | 2.8 ns           | Cys132        | 51%        | 1.5 ns           | Lys144        | 18%        | 0.8 ns           | Lys130       | 17%        | 1.1 ns           |
| Apt06          | Arg8         | 29%        | 3.2 ns           | Cys14        | 26%        | 0.4 ns           | Arg235        | 21%        | 3.3 ns           | Gln10         | 18%        | 1.1 ns           | Arg8         | 18%        | 4.6 ns           |
| Apt07          | Lys130       | 67%        | 1.6 ns           | Thr253       | 52%        | 0.9 ns           | Tyr146        | 50%        | 4.1 ns           | Asn81         | 41%        | 1.0 ns           | Ser129       | 33%        | 1.2 ns           |
| Apt08          | Thr139       | 53%        | 17.6 ns          | Glu133       | 21%        | 3.7 ns           | Glu133        | 19%        | 2.9 ns           | Lys141        | 13%        | 0.7 ns           | Lys141       | 13%        | 0.3 ns           |
| Apt09          | Arg252       | 69%        | 2.5 ns           | Tyr146       | 50%        | 1.2 ns           | Thr253        | 49%        | 0.9 ns           | Arg252        | 48%        | 1.0 ns           | Asp254       | 30%        | 1.7 ns           |
| Apt10          | Glu95        | 50%        | 2.2 ns           | Tyr94        | 32%        | 2.0 ns           | Ser129        | 29%        | 1.7 ns           | Tyr94         | 24%        | 0.5 ns           | Lys127       | 21%        | 1.2 ns           |
| Apt01rc        | Thr139       | 50%        | 1.1 ns           | Tyr140       | 41%        | 0.9 ns           | Cys132        | 26%        | 0.4 ns           | Lys141        | 22%        | 0.7 ns           | Lys141       | 19%        | 0.7 ns           |
| Apt02rc        | Thr253       | 90%        | 5.5 ns           | Thr84        | 64%        | 13.9 ns          | Thr253        | 47%        | 1.0 ns           | Asp254        | 41%        | 0.7 ns           | Ser150       | 40%        | 1.3 ns           |
| Apt03rc        | Arg252       | 67%        | 2.0 ns           | Gln142       | 43%        | 0.6 ns           | Arg85         | 43%        | 2.5 ns           | Tyr148        | 40%        | 2.8 ns           | Arg85        | 38%        | 1.6 ns           |
| Apt04rc        | Thr139       | 87%        | 8.9 ns           | Arg252       | 65%        | 2.2 ns           | Cys132        | 61%        | 0.7 ns           | Arg252        | 54%        | 4.1 ns           | Gly135       | 49%        | 1.7 ns           |
| Apt05rc        | Lys127       | 53%        | 0.5 ns           | Cys132       | 46%        | 0.6 ns           | Tyr140        | 32%        | 0.5 ns           | Thr139        | 24%        | 0.6 ns           | Lys127       | 19%        | 0.4 ns           |
| Apt06rc        | Ser137       | 86%        | 12.7 ns          | Ser129       | 65%        | 4.3 ns           | Gly135        | 58%        | 1.4 ns           | Lys127        | 56%        | 1.1 ns           | Thr139       | 51%        | 1.2 ns           |
| Apt07rc        | Gly135       | 63%        | 0.8 ns           | Ser129       | 54%        | 3.4 ns           | Ser137        | 43%        | 0.7 ns           | Lys130        | 29%        | 0.6 ns           | Tyr136       | 28%        | 0.4 ns           |
| <b>Apt08rc</b> | <b>Ser65</b> | <b>64%</b> | <b>31.0 ns</b>   | <b>Ser65</b> | <b>45%</b> | <b>1.0 ns</b>    | <b>Tyr148</b> | <b>33%</b> | <b>0.5 ns</b>    | <b>Cys128</b> | <b>32%</b> | <b>0.8 ns</b>    | <b>Arg85</b> | <b>30%</b> | <b>1.3 ns</b>    |
| Apt09rc        | Arg235       | 67%        | 1.7 ns           | Arg235       | 63%        | 2.8 ns           | Ser4          | 31%        | 1.4 ns           | Trp206        | 25%        | 0.7 ns           | Tyr165       | 24%        | 1.9 ns           |
| Apt10rc        | Asn47        | 21%        | 0.6 ns           | His45        | 13%        | 0.2 ns           | Tyr165        | 12%        | 1.5 ns           | Asn47         | 5%         | 0.2 ns           | Gln142       | 5%         | 0.7 ns           |

**Table S2. Amino acid residues of CatB that establish at least one hydrogen bond with an aptamer for more than 50% of the simulation time.** The number of hydrogen bonds corresponds to the sum of all hydrogen bonds established between that amino acid residue and any aptamer.

| <b>Amino acid</b> | <b># H-Bonds</b> |
|-------------------|------------------|
| Thr139            | 6                |
| Arg252            | 4                |
| Gly135            | 3                |
| Lys127            | 2                |
| Ser129            | 2                |
| Lys130            | 2                |
| Cys132            | 2                |
| Tyr146            | 2                |
| Arg235            | 2                |
| Thr253            | 2                |
| Ser65             | 1                |
| Thr84             | 1                |
| Arg85             | 1                |
| Glu95             | 1                |
| Ser137            | 1                |
| Lys141            | 1                |
| Tyr148            | 1                |
| Ser150            | 1                |
| Asn167            | 1                |
